# Supplementary material for: A Pathogenic Role for FcγRI in the Immune Response against Chlamydial Respiratory Infection
Source: MDPI journal article supplement (doi:10.3390/microorganisms11010039), 2022-12-22
Supplement: s1 [file s1]

# A pathogenic role for FcγRI in the immune response against chlamydial respiratory infection

**Supplementary Table S1. The primer sequences used for qPCR analysis.**

| Gene name | Forward primer (5'→3')    | Reverse primer (5'→3')   |
|-----------|---------------------------|--------------------------|
| β-actin   | GGCTGTATTCCCCTCCATCG      | CCAGTTGGTAACAATGCCATGT   |
| Fcgr1     | TCCACACAATGGTTTATCAACGG   | CACTGTCCTGAAAACCTGGCCT   |
| 16S rRNA  | CGCCTGAGGAGTACACTCGC      | CCAACACCTCACGGCACGAG     |
| IL-6      | TGAACAACGATGATGCACTTGACAG | TAGCCACTCCTTCTGTGACTCCAG |
| IL-1β     | GAAATGCCACCTTTTGACAGTG    | TGGATGCTCTCATCAGGACAG    |
| TNFα      | CTGAACTTCGGGGTGATCGG      | GGCTTGTCACTCGAATTTTGAGA  |
| T-bet     | AACCGCTTATATGTCCACCCA     | CTTGTTGTTGGTGAGCTTTAGC   |
| IL-12p35  | CAATCACGCTACCTCCTCTTTT    | CAGCAGTGCAGGAATAATGTTTC  |
| IL-12p40  | TGGTTTGCCATCGTTTTGCTG     | ACAGGTGAGGTTCACTGTTTCT   |
| IL-10     | CTTACTGACTGGCATGAGGATCA   | GCAGCTCTAGGAGCATGTGG     |
| TGF-β     | AAAACAGGGGCAGTTACTACAAC   | TGGCAGATATAGACCATCAGCA   |

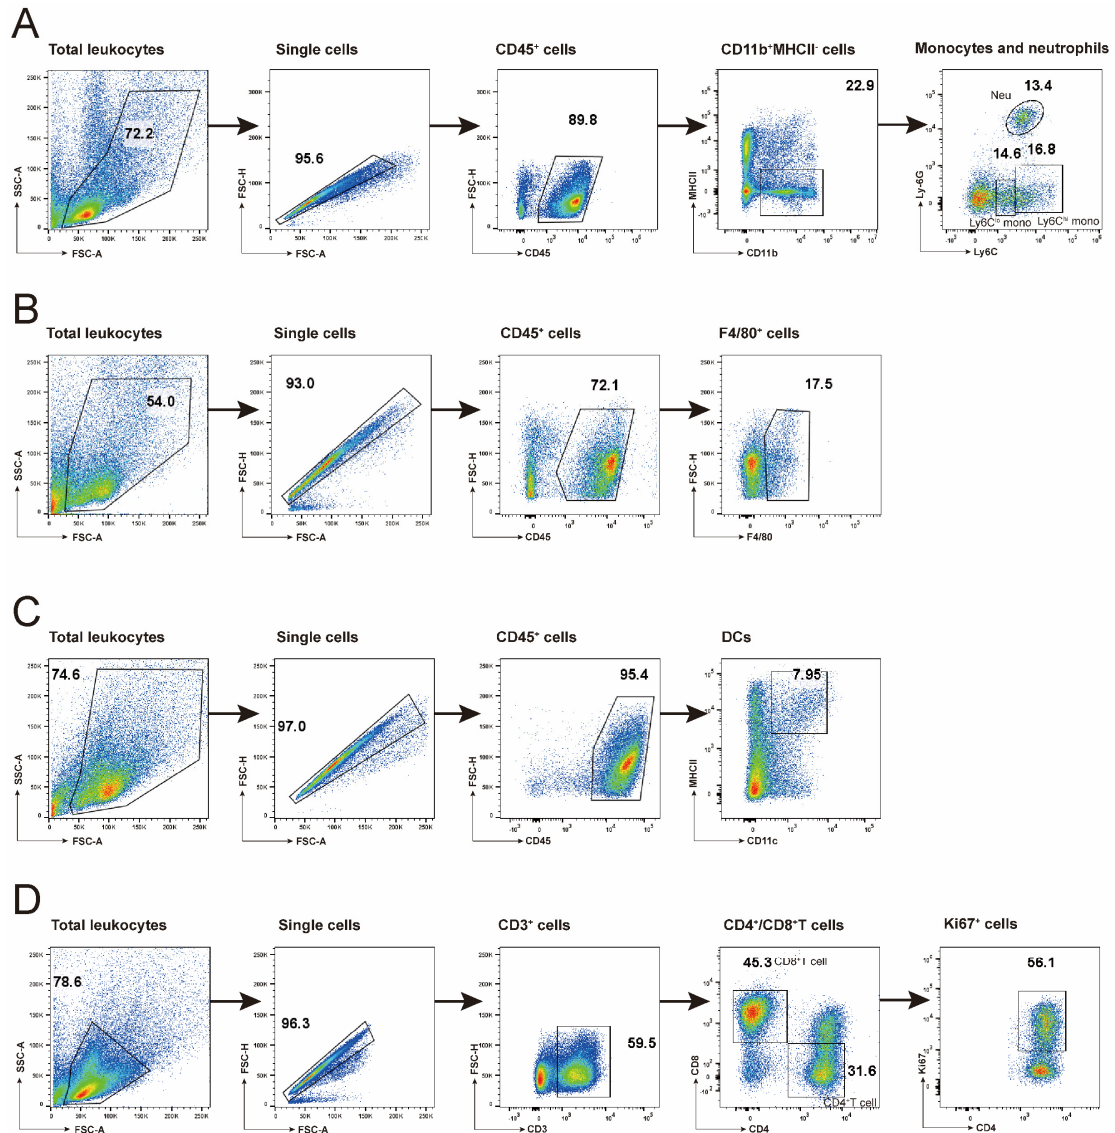

**Supplementary Figure S1.** The flow cytometry gate strategy for the analysis of innate and adaptive immune cells. Related to Figures 2 and 3. (A) Ly6C<sup>hi</sup> monocytes were presented as CD45<sup>+</sup>CD11b<sup>+</sup>MHCII<sup>+</sup>Ly6G<sup>-</sup>Ly6C<sup>hi</sup> cells, Ly6C<sup>lo</sup> monocytes were presented as CD45<sup>+</sup>CD11b<sup>+</sup>MHCII<sup>+</sup>Ly6G<sup>-</sup>Ly6C<sup>lo</sup> cells, and neutrophils were presented as CD45<sup>+</sup>CD11b<sup>+</sup>MHCII<sup>+</sup>Ly6G<sup>+</sup> cells. (B) macrophages were presented as CD45<sup>+</sup>F4/80<sup>+</sup> cells. (C) DCs were presented as CD45<sup>+</sup>CD11c<sup>+</sup>MHCII<sup>+</sup> cells. (D) CD4<sup>+</sup> T cells were presented as CD3<sup>+</sup>CD4<sup>+</sup> cells, and CD8<sup>+</sup> T cells were presented as CD3<sup>+</sup>CD8<sup>+</sup> cells.

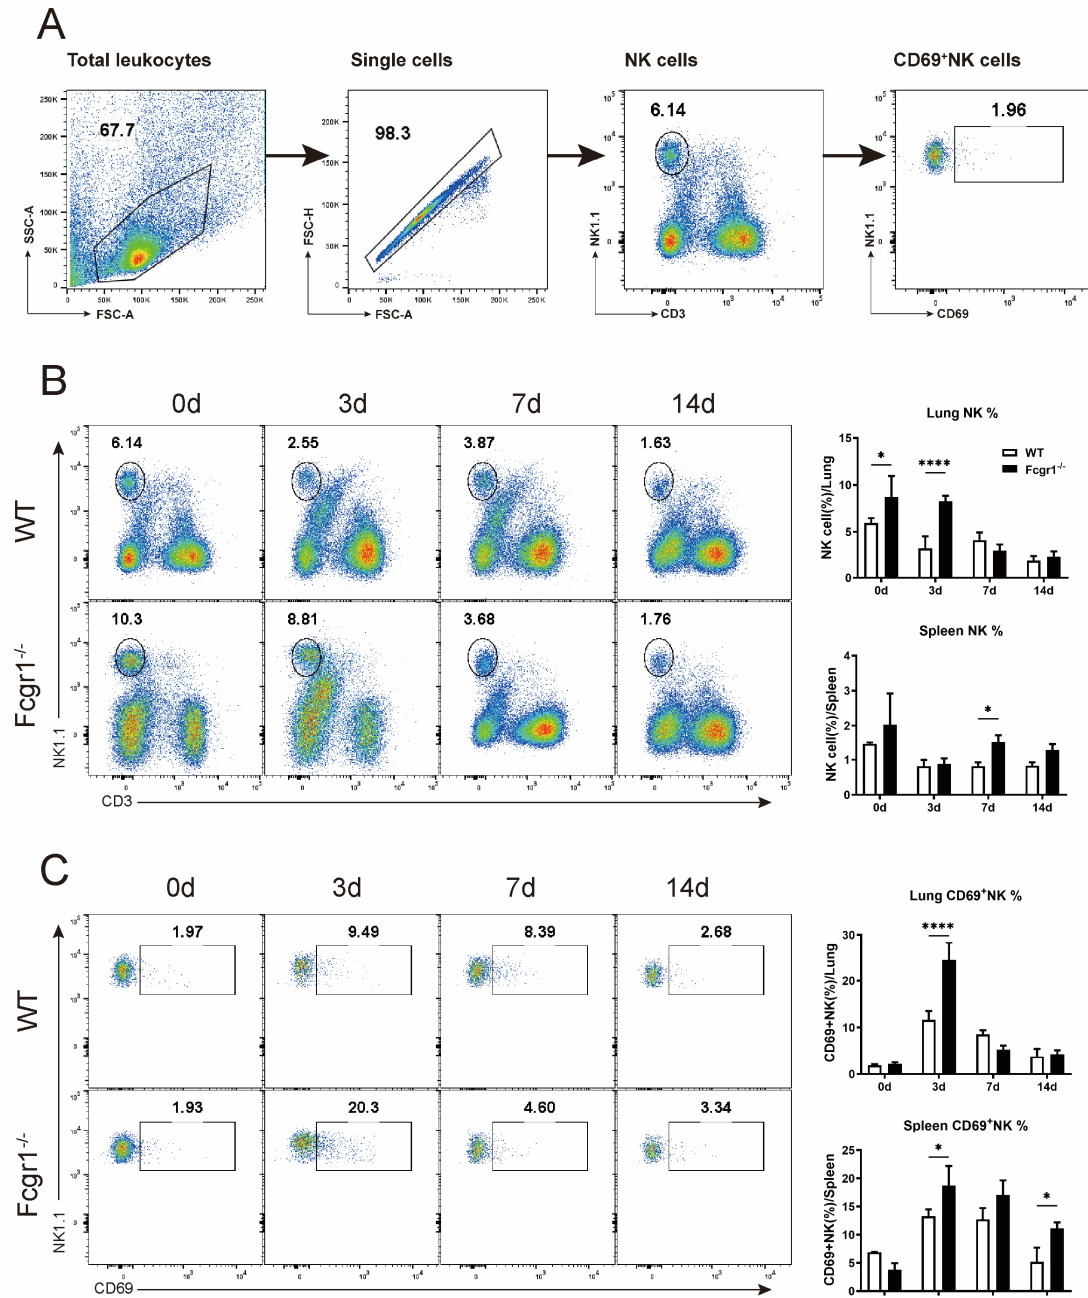

**Supplementary Figure S2.** Infiltrations and activation of NK cells in the lung and spleen of Fcgr1<sup>-/-</sup> mice following *Chlamydia muridarum* (*C. muridarum*) respiratory infection. An animal model of *C. muridarum* respiratory infection was induced by intranasally inoculating with  $1 \times 10^3$  inclusion forming units (IFUs) *C. muridarum*. The lung and spleen single cells of wild-type (WT) and FcγRI deficient (Fcgr1<sup>-/-</sup>) mice on days 0, 3, 7, and 14 post-infection (p.i.) were prepared. (A) Representative flow cytometry gating to identify NK cells (CD3<sup>+</sup>NK1.1<sup>+</sup> cells) and the activity of NK cells (CD3<sup>+</sup>NK1.1<sup>+</sup>CD69<sup>+</sup> cells). (B) Representative flow cytometric plots (left panel) and

the percentages of NK in the lung (top right panel) and spleen (bottom right panel) are shown. (C) Representative flow cytometric plots (left panel) and the percentages of CD69<sup>+</sup>NK cells in the lung (top right panel) and spleen (bottom right panel) are shown. Data are represented as means  $\pm$  SD from n = 3 - 5 per group, representative of one of three independent experiments. Statistical significances of differences are determined by two-way ANOVA followed by Šídák's multiple comparisons test. \*  $P < 0.05$ , \*\*\*\*  $P < 0.0001$ .
